# Adaptive human behavior and delays in information availability autonomously modulate epidemic waves.

Md Shahriar Mahmud<sup>1</sup>, Solomon Eshun<sup>1</sup>, Baltazar Espinoza<sup>2</sup>, Claus Kadelka<sup>1,\*</sup>

**1 Department of Mathematics, Iowa State University, Ames, IA 50011, United States**

**2 Biocomplexity Institute, University of Virginia, Charlottesville, VA 22911, United States**

\* [ckadelka@iastate.edu](mailto:ckadelka@iastate.edu)

## Abstract

The recurrence of epidemic waves has been a hallmark of infectious disease outbreaks. Repeated surges in infections pose significant challenges to public health systems, yet the mechanisms that drive these waves remain insufficiently understood. Most prior models attribute epidemic waves to exogenous factors, such as transmission seasonality, viral mutations, or implementation of public health interventions. We show that epidemic waves can emerge autonomously from the feedback loop between infection dynamics and human behavior. Our results are based on a behavioral framework in which individuals continuously adjust their level of risk mitigation subject to their perceived risk of infection, which depends on information availability and disease severity. We show that delayed behavioral responses alone can lead to the emergence of multiple epidemic waves. The magnitude and frequency of these waves depend on the interplay between behavioral factors (delay, severity, and sensitivity of responses) and disease factors (transmission and recovery rates). Notably, if the response is either too prompt or excessively delayed, multiple waves cannot emerge. Our results further align with previous observations that adaptive human behavior can produce non-monotonic final epidemic sizes, shaped by the trade-offs between various biological and behavioral factors—namely, risk sensitivity, response stringency, and disease generation time. Interestingly, we found that the minimal final epidemic size occurs on regimes that exhibit a few damped oscillations. Altogether, our results emphasize the importance of integrating social and operational factors into infectious disease models, in order to capture the joint evolution of adaptive behavioral responses and epidemic dynamics.

## Significance statement

We develop a behavioral-epidemiological framework in which individuals adjust their level of risk mitigation (e.g., social distancing, mask-wearing) based on both the available information and their perceived risk of infection. We show that the feedback loop between infectious disease dynamics and human behavior can autonomously produce multiple epidemic waves. The disease dynamics are strongly influenced by the interplay between the timing, severity and sensitivity of behavioral responses, as well as transmission and recovery rates. Moreover, our results confirm that adaptive human behavior can produce non-monotonic final epidemic sizes, which we show is due to oscillatory epidemic dynamics. Interestingly, we found that in the absence of interventions, the minimal final epidemic size occurs on regimes exhibiting a few damped oscillations.

**Keywords.** Infectious disease modeling, Adaptive human behavior, Behavioral epidemiology, Nonlinear dynamics, Risk perception

**Author contributions.** Conceptualization: CK, BE; Formal analysis: MSM, SE, BE, CK; Methodology: MSM, SE, BE, CK; Software: MSM, SE, CK; Visualization: MSM, CK; Supervision: CK, BE; Writing: MSM, SE, BE, CK.

**Author declaration.** The authors declare no competing interests

## 1 Introduction

2 The recurrence of epidemic waves has been a defining characteristic of various infectious disease outbreaks  
3 throughout history. Notable examples of epidemics exhibiting multi-wave dynamics include the 1918  
4 H1N1 “Spanish Flu” pandemic, influenza pandemics and more recent occurrences such as the 2009  
5 H1N1 pandemic and the COVID-19 pandemic [1–3]. Repeated surges in new infections pose significant  
6 challenges to public health systems, calling for a deeper understanding of the underlying mechanisms  
7 driving such contagion waves. A key question persists: what causes the emergence of multiple waves  
8 during epidemics, and how can these waves be predicted and mitigated?

9 Compartmental models have been foundational in the study of infectious disease dynamics [4, 5],  
10 and numerous modifications have been introduced in an effort to understand and predict multi-wave  
11 dynamics. There is an extensive literature on epidemiological models that exhibit oscillatory dynamics.  
12 Some models emphasize the impact of biological factors, such as seasonal transmissibility, human  
13 immune response heterogeneity, spatial scale, population mobility, and viral mutation, in driving multi-  
14 wave epidemics [6–12]. Nonetheless, recent pandemics highlighted the shortcomings of these models,  
15 demonstrating that transmission dynamics both drive and are driven by individuals’ behavioral responses.  
16 Behaviors, including social distancing, mask-wearing, and changes in mobility, dynamically evolve in  
17 response to perceived infection risk, media coverage, and public health policies [12–17].

18 Recent studies using disease-behavior interaction models have shown that social dynamics can also  
19 induce oscillatory and even chaotic epidemic dynamics. Examples of social factors driving such dynamics  
20 include the ‘stickiness effect’ (resistance to behavioral changes) in compliance with nonpharmaceutical  
21 interventions (NPIs), early relaxation of control measures, and pandemic fatigue [18–27]. Numerous  
22 studies incorporate human behavior driven by awareness, economic incentives, and risk factors, which  
23 act at both the individual and population level [28–31]. Game theoretic approaches are also commonly  
24 used to incorporate individual behavioral choices [32–37]. These modeling approaches aim to capture the  
25 coevolution of the epidemic process and behavioral adaptations, usually assuming availability of complete,  
26 accurate and immediate information. For instance, depending on the severity of an infectious disease  
27 outbreak, people make behavioral decisions about how strictly they adhere to mask-wearing guidelines,  
28 mobility or meeting restrictions. These choices influence the spread of infection, affecting the success of  
29 interventions and even altering the trajectory of epidemics [38–41].

30 Despite improvement on understanding the complex dynamics between human behavioral responses  
31 during epidemics, less attention has been given to modeling the impact of information delays on  
32 the decision-making process. Some models assume that disease awareness simultaneously spreads  
33 over the population as a dual social contagion, which implicitly leads to heterogeneous behavioral  
34 responses [19, 42, 43]. However, the accuracy and availability of information depend on the identification  
35 of transmission through epidemiological monitoring systems, which may face operational constraints, such  
36 as limited resources [44, 45]. Delayed behavioral responses are well-documented in epidemiological studies.  
37 The delays may fluctuate due to a number of social and operational factors. For instance, individuals  
38 often take time to perceive the severity of an outbreak and adjust their behaviors accordingly [46–48].  
39 On the other side, limited surveillance systems or misinformation may jeopardize individuals’ behavioral  
40 choices [45, 49].

41 Together, the intertwined dynamics between information, behavioral changes and disease transmission,  
42 create a series of feedback loops that shape infectious disease dynamics. Consequently, understanding  
43 the joint dynamics of behavioral adaptations and disease transmission requires to unveil the role of  
44 information availability, as behavioral-driven waves can emerge from endogenous incentives without the  
45 need for exogenous shocks. In this study, we use a behavioral-epidemiological model to examine the  
46 trade-off between disease progression, information delays, and the stringency of behavioral responses  
47 in generating oscillatory dynamics. Our modeling approach builds on the classical awareness-based  
48 models by incorporating a lagged response of the population to the infection prevalence [50–52]. We  
49 model behavioral changes as adjustments in social interactions, which ultimately affect the population’s  
50 likelihood of infection. That is, individuals choose their level of daily social interactions, given their  
51 understanding of infection risks driven by information availability. In this way, behavioral responses  
52 depend on the current or the recent state of the epidemic.

53 Our findings show that behavioral responses driven by immediate information reduce the peak size  
54 relative to the standard, “behavior-free” model, and avoid oscillatory dynamics. On the other hand, we  
55 show that delayed information can produce multi-wave dynamics, where the number and intensity of the  
56 waves are modulated by the trade-off between the behavioral response stringency, the information delay,  
57 and the disease generation time. Moreover, delayed behavioral responses can produce non-monotonic  
58 final epidemic sizes. The minimal final epidemic size occurs during information-behavioral regimes that  
59 produce a few damped epidemic waves. In other words, our results suggest that neither single peak  
60 scenarios nor sustained multi-wave dynamics minimize the final epidemic size.

## 61 Methods

62 In this section, we present how a standard SIR-type infectious disease model can be adapted to account  
63 for average, population-wide behavioral adaptations that depend on the disease prevalence. The model is  
64 designed to capture the dynamic interplay between infection spread and collective behavior, highlighting  
65 the potential for such reactions to influence the progression and recurrence of waves during an epidemic.

66 In this study, we envision contact reduction as the set of behavioral changes aimed at lowering the  
67 effective transmission of the disease. Individuals’ behavioral responses represent actions to minimize  
68 their exposure risk. For instance for respiratory infectious diseases, these include practicing social  
69 distancing, wearing masks, and increasing hygiene practices. Unlike standard SIR models where the  
70 contact rate remains fixed, our model accounts for dynamic adjustments based on perceived infection risk.  
71 This adaptive behavior directly modifies the transmission rate based on the available—possibly delayed—  
72 information about the prevalence of infection. This nuanced representation of behavioral changes allows  
73 us to simulate real-world scenarios where the timing and intensity of behavioral responses play a critical  
74 role in determining the trajectory and potential waves of epidemics.

## 75 Model description

76 The standard SIR model divides the population into three key compartments: susceptible ( $S$ ), infected  
77 ( $I$ ), and recovered ( $R$ ). The progression of the epidemic is modeled using differential equations that  
78 describe the processes of infection and recovery. To capture the influence of behavioral responses during  
79 an outbreak, we extend this model by incorporating a population-wide contact reduction factor, driven  
80 by perceived risk. Let  $r(I/N) \in [0, 1]$  represent the average population-wide behavioral response. While  
81 individual risk perceptions vary, it is reasonable to assume that, at the population level, risk mitigation  
82 increases as the number of infected individuals rises, i.e.,  $dr/dI > 0$ . This leads to the following system  
83 of (delay) differential equations, which forms the basis of our analysis:

$$\begin{aligned}\frac{dS}{dt} &= -(1 - r(I(t - \tau)/N))\beta\frac{SI}{N}, \\ \frac{dI}{dt} &= (1 - r(I(t - \tau)/N))\beta\frac{SI}{N} - \gamma I, \\ \frac{dR}{dt} &= \gamma I.\end{aligned}\tag{1}$$

84 Here,  $\beta$  is the transmission rate,  $\gamma$  is the recovery rate, and  $N(= S + I + R)$  represents the total  
85 population. Note that, by design, the model dynamics do not depend on the choice of  $N$ . The contact  
86 reduction factor,  $r(I(t - \tau)/N)$ , evolves over time in response to the prevalence level (i.e., the number of  
87 active cases), with  $\tau$  capturing the delay in data reporting and the population’s decision-making process.  
88 Since the specific form of the response function is unknown and varies based on a pathogen’s perceived  
89 risk, we explore two functional forms, each defined by two key parameters:

$$\text{Hill function: } r_h(I/N) = 1 - \frac{1}{1 + \left(\frac{\log_{10}(c)}{\log_{10}(I/N)}\right)^{k_h}},\tag{2}$$

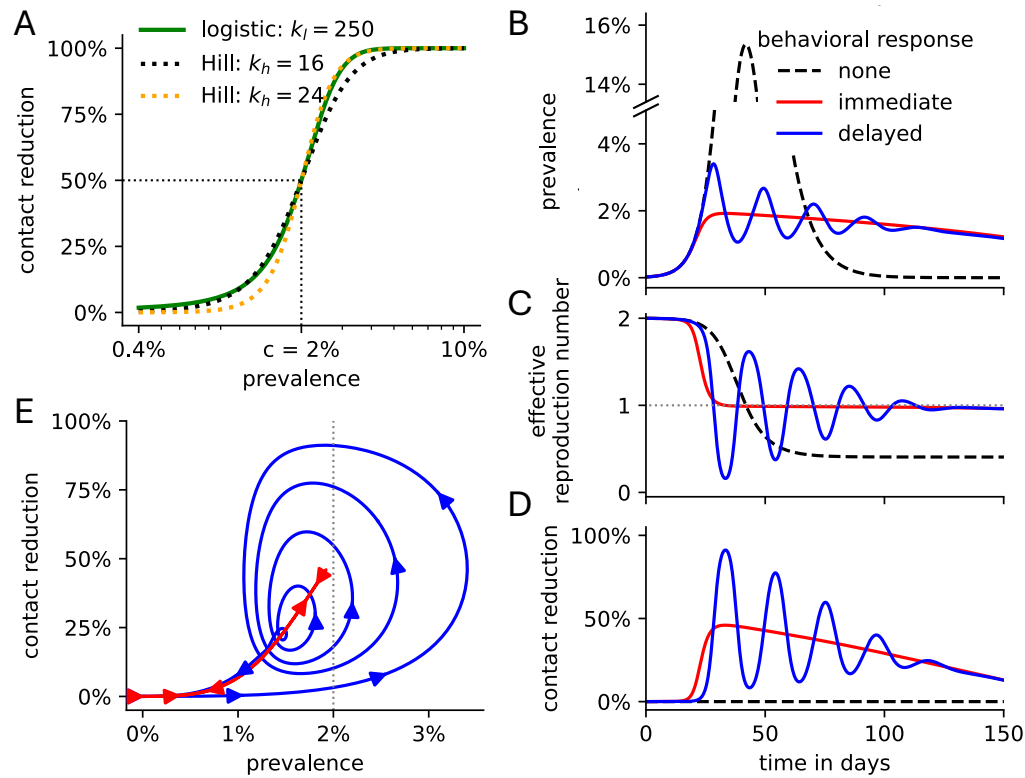

**Figure 1.** Delayed behavioral responses can induce epidemic waves. (A) Linear-scaled logistic functions (solid green line) and log-scaled Hill functions (dotted lines) can both describe the disease prevalence-dependent behavioral response. The behavioral response midpoint for all exemplary functions is fixed at  $c = 2\%$ , while the sensitivity parameter ( $k_h, k_l$ , respectively) varies. (B) Disease prevalence, (C) effective reproduction number, and (D) contact reduction over time, and for different behavioral responses: none as in the standard SIR model (dashed black lines), immediate ( $\tau = 0$ ; solid red lines), delayed ( $\tau = 5$ ; solid blue lines). (E) Trajectory of the prevalence and contact reduction under an immediate (red) and delayed (blue) behavioral response. The arrows indicate the direction of the change over time. (B-E) All non-specified parameters are at their default values listed in Table 1. Specifically,  $c = 2\%$  and  $k_h = 16$ .

90

$$\text{logistic function: } r_l(I/N) = \frac{1}{1 + e^{-k_l(I/N - c)}}. \quad (3)$$

91 In these equations,  $c$  represents the prevalence threshold at which contacts are reduced by exactly  
 92 50%, and we refer to this parameter as the “behavioral response midpoint”. The parameters  $k_h, k_l$  govern  
 93 the sensitivity of the behavioral response, modulating how quickly the adaptation occurs as the number  
 94 of cases increases. Figure 1A illustrates examples of both Hill and logistic functions. When the prevalence  
 95 of the disease is low, individuals remain unaware of the outbreak, and contact reduction is minimal (i.e.,  
 96  $r(I) \approx 0$  for small  $I$ ). As the prevalence increases, contact reduction eventually approaches 100%, akin to  
 97 a complete lockdown. Due to the logarithmic scaling in the Hill function, contact reduction increases  
 98 more gradually at higher case numbers compared to the logistic function. As shown in Figure 1A, when  
 99 the behavioral response midpoint is set to  $c = 2\%$ , a Hill function with  $k_h = 16$  closely matches a logistic  
 100 function with  $k_l = 250$  at prevalence levels around 1.5-2%, while a Hill function with  $k_h = 24$  better  
 101 matches the same logistic function at higher prevalence levels. This is due to the different scaling in the  
 102 Hill (log-scaled) and logistic (linear-scaled) function.

**Table 1.** Model parameters

| Parameter | Description                              | Default value    |
|-----------|------------------------------------------|------------------|
| $\beta$   | transmission rate                        | 0.4              |
| $\gamma$  | recovery rate                            | 0.2              |
| $c$       | behavioral response midpoint             | 2% of population |
| $k_h$     | Hill behavioral response sensitivity     | 16               |
| $k_l$     | logistic behavioral response sensitivity | 250              |
| $\tau$    | delay in response                        | 5 days           |

### 103 **Effective reproduction number**

104 The effective reproduction number,  $R_{\text{eff}}(t)$ , quantifies the expected number of secondary infections caused  
105 by an infected individual at a specific time  $t$  [53, 54]. Unlike the basic reproduction number,  $\mathcal{R}_0 = \beta/\gamma$ ,  
106 which assumes that the entire population is susceptible (except for an arbitrarily small number of initially  
107 infected individuals),  $R_{\text{eff}}(t)$  varies over the course of an outbreak. This variation occurs due to factors  
108 such as the depletion of the susceptible population or behavioral changes in response to perceived risk.  
109 In this study,  $R_{\text{eff}}(t)$  plays a key role in explaining the impact of incorporating information delays, which  
110 leads to the emergence of epidemic waves driven by changes in population-wide contact levels as the  
111 disease prevalence fluctuates. The rate of change in the number of infected individuals can be expressed  
112 as

$$\frac{dI(t)}{dt} = \left( (1 - r(I(t - \tau)/N)) \frac{\beta S(t)}{\gamma N} - 1 \right) \gamma I(t).$$

113 The effective reproduction number with information delay  $\tau$  is then given by

$$\mathcal{R}_{\text{eff}}(t; \tau) := (1 - r(I(t - \tau)/N)) \mathcal{R}_0 \frac{S(t)}{N}.$$

114 Note that the disease prevalence increases (i.e.,  $\frac{dI(t)}{dt} > 0$ ) if and only if  $\mathcal{R}_{\text{eff}}(t; \tau) > 1$ .

### 115 **Simulation**

116 We employed the fourth-order Runge-Kutta method (RK4) to simulate the model dynamics with a time  
117 step of  $\Delta t = 0.1$  [55, 56]. The RK4 method provides a computationally efficient approach for solving  
118 ordinary differential equations (ODEs) by evaluating the derivatives at intermediate points between time  
119 steps and taking a weighted average of these derivatives. The use of the high-performance Python compiler  
120 Numba substantially improved the compute time [57]. To account for a delay of  $\tau$  in the reporting of  
121 cases and subsequent decision-making, we track the history of the number of infected individuals  $I$  over  
122 time in the array  $I_{\text{history}}$ . The values of  $I_{\text{history}}$  represent the number of infected individuals at previous  
123 time points, which is necessary for simulating delayed effects on the response function in the model. To  
124 ensure the simulation starts with a consistent history, the initial values of  $I_{\text{history}}$  are all set to the initial  
125 number of infections,  $I(0)$ . Throughout, we used  $I(0) = 0.02\%$ . That is,

$$I_{\text{history}}(t) = \begin{cases} I(0) & t < \tau \\ I(t - \tau) & t \geq \tau \end{cases} \quad (4)$$

126 This history tracking method enables an accurate modeling of delays without introducing substantial  
127 computational cost. Table 1 describes all model parameters and their default values that are used  
128 throughout unless otherwise stated. All simulations were conducted using Python 3.11.5.

### 129 **Counting waves in disease dynamics**

130 To quantify the number of waves in the model dynamics, we define a wave as a significant peak (i.e., local  
131 maximum) in the number of infected individuals over time. We counted peaks using the `find_peaks`

132 algorithm from the Python library `scipy.signal`. Each peak possesses a prominence value, which  
133 quantifies the least drop in height necessary in order to get from the peak to any point with even higher  
134 value. We used a prominence threshold of 0.2% to ensure that only notable peaks in the number of  
135 infected individuals are counted as independent waves, filtering out minor fluctuations. The total number  
136 of waves is then defined as the number of peaks in the prevalence function over time. Note that the  
137 minimal number of waves is one, as long as the number of initially infected individuals is greater than  
138 the prominence threshold of 0.2%.

## 139 Results

### 140 Immediate behavioral adjustment in response to an infectious disease outbreak

141 The standard SIR model (Eq. 1 with  $r \equiv 0$ ) possesses two parameters: the transmission rate  $\beta$  and the  
142 recovery rate  $\gamma$ . From these parameters, we can derive the basic reproduction number  $\mathcal{R}_0 = \beta/\gamma$ , which  
143 describes the expected number of secondary infections caused by the first infected person when everyone  
144 else is still susceptible. Here, we assume  $\beta = 0.4, \gamma = 0.2$  so that  $\mathcal{R}_0 = 2$ . Since  $\mathcal{R}_0 > 1$ , the number  
145 of infected individuals increases over time until the number of susceptibles has been depleted by  $1/\mathcal{R}_0$ ,  
146 corresponding to  $\mathcal{R}_{\text{eff}}(t) = 1$  (Fig. 1B,C). Beyond this peak, the disease prevalence decreases. While  
147  $\mathcal{R}_0 = \mathcal{R}_{\text{eff}}(0)$  is constant, the effective reproduction number  $\mathcal{R}_{\text{eff}}(t)$  decreases over time as the number of  
148 remaining susceptibles declines (Fig. 1C). This yields a single, prominent epidemic peak.

149 In reality, individuals decrease their effective contacts (through social distancing, mask wearing, etc.)  
150 in response to a severe infectious disease outbreak, as exemplified by the recent COVID-19 pandemic [58].  
151 Aggregated individual-level behavior gives rise to a population-wide effective contact reduction, which  
152 depends on the current or recent level of disease prevalence and can be qualitatively captured by both  
153 Hill functions (Eq. 2) and logistic functions (Eq. 3; Fig. 1A). Prior to awareness and media attention, a  
154 population does not engage in outbreak-related risk mitigation measures (i.e.,  $r(I/N = 0) = 0$ ). As the  
155 prevalence of an infectious disease rises, an increasing number of individuals fear getting infected, and  
156 more risk mitigation policies are put in place (i.e.,  $dr/dI > 0$ ), both at the individual and the societal  
157 level. We hypothesized, in the absence of data, that the population-wide reduction in effective contacts  
158 likely follows a logarithmic scale, which means that a change in prevalence from, e.g., 1% to 2% would  
159 result in the same change in behavioral response as a change from 2% to 4%. Accordingly, we used a  
160 log-scaled Hill function to model this response in our main results. For comparison, results based on a  
161 linear-scaled logistic function, which yielded qualitatively similar outcomes (Fig. S1 and Fig. S2), are  
162 presented in the supplement.

163 The Hill functional response is characterized by two parameters: the behavioral response midpoint  $c$ ,  
164 at which contacts are reduced by exactly 50%, and the parameter  $k_h$ , which describes the sensitivity of  
165 the behavioral response to changes in disease prevalence. In the absence of data, we fixed  $c = 2\%$  and  
166  $k_h = 16$  and varied these parameters in later sensitivity analyses. In reality, these parameters will depend  
167 on the severity of the disease. For example, people will engage in higher levels of risk mitigation (i.e.,  $c$  is  
168 lower) during an Ebola outbreak (characterized by high hospitalization and mortality rates) versus a  
169 seasonal flu outbreak. In the scenario where contact levels depend on current disease prevalence (i.e., no  
170 delay ( $\tau = 0$ ) in case-reporting and decision-making), disease dynamics differ substantially from standard  
171 SIR dynamics: the effective reproduction number decreases to 1 much faster – before  $1/\mathcal{R}_0$  of individuals  
172 have become infected (Fig. 1B,C). This is due to the prevalence-dependent reduction in effective contacts,  
173 driven by the immediate and sustained transmission-reducing behavioral adaptation (Fig. 1D). The  
174 effective reproduction number then stabilizes for an extended period of time at values just below 1.  
175 During this period, the overall activity level of the population gradually increases, while the disease  
176 prevalence and the number of susceptible individuals both steadily but slowly decline. Eventually,  $\mathcal{R}_{\text{eff}}$   
177 drops markedly below 1, quickly leading to an end of the outbreak. While the shape of the epidemic  
178 curve is very different, an immediate contact reduction (i.e.,  $\tau = 0$ ) only yields one, albeit prolonged  
179 epidemic wave.

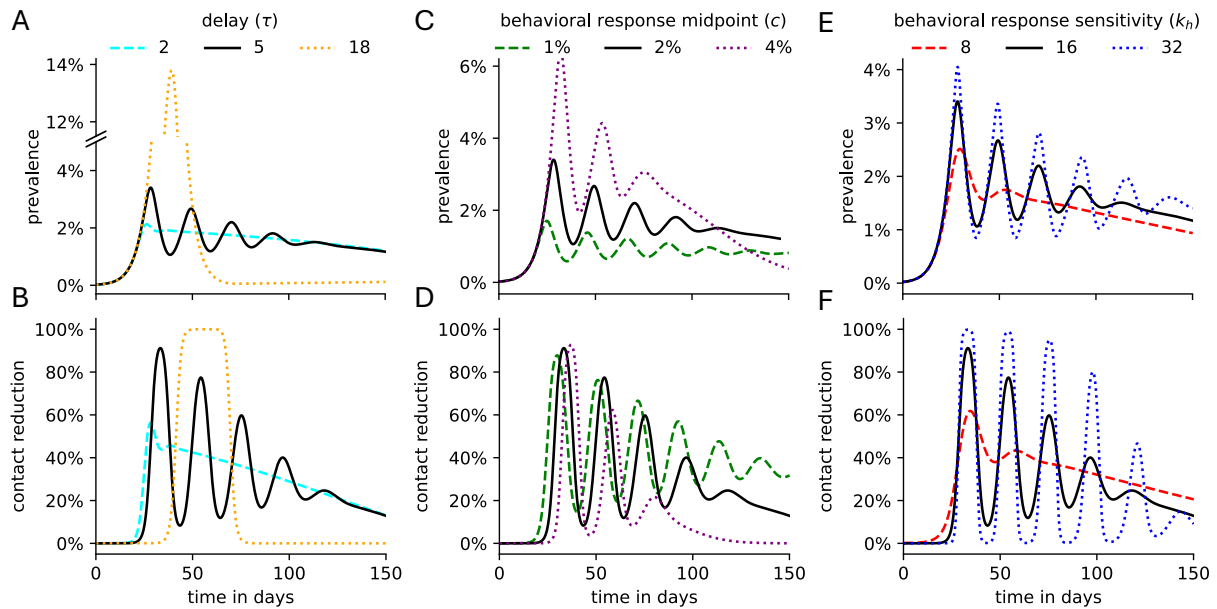

**Figure 2.** Disease dynamics and population-wide contact reduction for a variety of delays and Hill response functions. Given a delay of  $\tau$  days and a population-wide contact reduction function, parametrized by the behavioral response midpoint  $c$  and the sensitivity  $k_h$ , the (A,C,E) disease prevalence and (B,D,F) population-wide contact reduction is plotted over time for several (A,B)  $\tau$ -values, (C,D)  $c$ -values and (E,F)  $k_h$ -values. All non-specified parameters are at their default values listed in Table 1. In all sub panels, the solid black line depicts the dynamics for  $\tau = 5$ ,  $c = 2\%$ ,  $k_h = 16$ .

## 180 Delayed behavioral adjustment in response to an infectious disease outbreak

181 We next investigated the effect of delay in behavior adjustment on the shape of epidemic curves. In  
 182 reality, the delay is always positive because information on new infections first requires diagnosis and then  
 183 reporting. The detrimental impact of delays in diagnosis on individual disease progression, disease spread,  
 184 and economic outcomes has been extensively studied for many infectious diseases, e.g., COVID-19 [46],  
 185 African viral hemorrhagic fever [47] and foot-and-mouth disease [59]. Here, we explore the effect of  
 186 delays on inducing epidemic waves. Assuming a constant delay of  $\tau = 5$  days, the initial outbreak size  
 187 increases quickly due to the unawareness of the population. Once contacts are reduced in response to  
 188 the large outbreak, the effective reproduction number drops quickly below 1 giving rise to a first peak  
 189 in disease prevalence (Fig. 1B-D). Following the drop in prevalence, the population-wide activity level  
 190 increases again after a delay of  $\tau = 5$  days. This rise leads to  $\mathcal{R}_{\text{eff}} > 1$  and the emergence of a second  
 191 epidemic peak, which is less prominent than the first due to the reduced number of remaining susceptible  
 192 individuals. This pattern repeats a few more times, with each subsequent peak exhibiting a smaller  
 193 amplitude in prevalence (Fig. 1E). Eventually, the effective reproduction number stabilizes just below  
 194 1. From this point forward, disease prevalence gradually declines, resembling the trend observed in the  
 195 absence of a delay. The shape of the epidemic curve depends strongly on the delay parameter. When the  
 196 delay is short (e.g.,  $\tau = 2$  days), the disease dynamics resembles the case of no delay, characterized by a  
 197 single, prolonged low-prevalence epidemic (Fig. 2A). After population-wide effective contacts are reduced  
 198 by about  $1/\mathcal{R}_0$ , activity levels begin to slowly increase as the prevalence level decreases (Fig. 2B). On the  
 199 other hand, when the delay is very long (e.g.,  $\tau = 18$  days), the disease dynamics resembles the standard  
 200 SIR model, characterized by one high prevalence peak. With long delays, the population-wide behavior  
 201 adjustment starts too late during the outbreak and can only slightly lower peak prevalence levels.

202 We explore the impact of varying the response function shape (parametrized by the behavioral  
 203 response midpoint  $c$  and the sensitivity parameter  $k_h$ ), to represent diverse expected population-wide  
 204 behavioral response. Higher  $c$ -values imply that contacts are reduced less strongly, leading to a larger

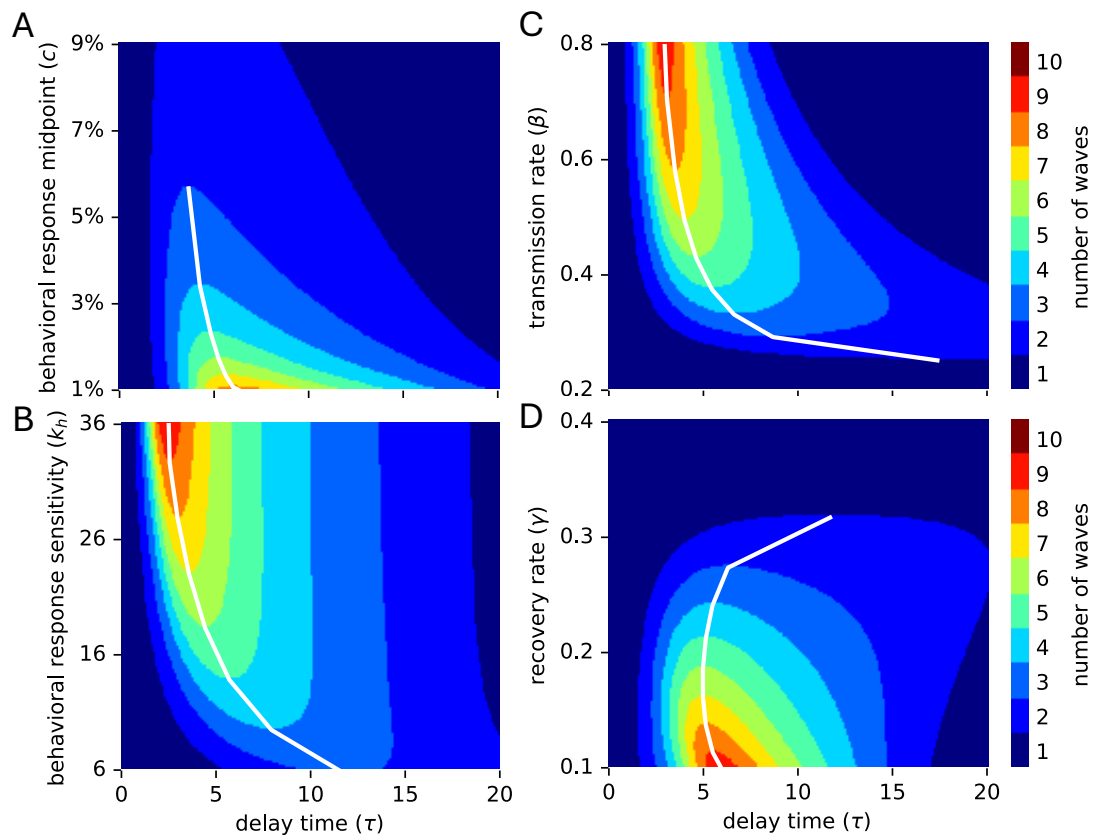

**Figure 3.** Two-dimensional sensitivity analysis. The number of epidemic waves is shown for a range of values for the delay parameter ( $\tau$ , x-axis) and another model parameter (y-axis): (A) behavioral response midpoint  $c$ , (B) behavioral response sensitivity  $k_h$ , (C) transmission rate  $\beta$ , (D) recovery rate  $\gamma$ . White lines connect the highest (in A,D) or lowest (in B,C) model parameter value and associated delay value that yields a specific number of multiple waves. All non-specified parameters are at their default values listed in Table 1.

205 first epidemic peak (Fig. 2C,D). This increased outbreak causes a larger reduction in the number of  
206 susceptibles, which explains why higher  $c$ -values are associated with fewer epidemic peaks and disease  
207 prevalence that begins more rapidly to drop steadily towards zero, as in the case of no delay (Fig. 1B-E).  
208 If the contact reduction is less sensitive to the prevalence level (i.e., low  $k_h$ -values), the contact reduction  
209 begins at lower prevalence levels (see Fig. 1A), leading to a lower first epidemic peak (Fig. 2E,F). The  
210 lower sensitivity also implies that the level of contact reduction does not change dramatically as the first  
211 wave of infections declines, yielding just one more faint peak in prevalence numbers. On the contrary,  
212 high  $k_h$ -values (e.g.,  $k_h = 32$ ) imply nearly complete lockdowns and relaxations between each epidemic  
213 wave, characterized by close to 100% and 0% population-wide effective contact reduction, respectively.  
214 A more sensitive behavioral response function (i.e., high  $k_h$ -values) induces more epidemic waves. This  
215 cannot be explained by variation in the number of susceptibles, which declines basically at the same speed  
216 for all  $k_h$ -values (indicated by the comparable area under the prevalence curves in Fig. 2E). Interestingly,  
217 the periodicity of the epidemic waves appears to solely depend on the delay parameter  $\tau$  but not on the  
218 midpoint or the sensitivity of the behavioral response function.

219 To further explore the connection between the number of epidemic waves and parameter choices,  
220 we varied the delay  $\tau$  between 0 and 20 days in addition to one of the model parameters: behavioral  
221 response midpoint  $c$ , behavioral response sensitivity  $k_h$ , transmission rate  $\beta$ , and recovery rate  $\gamma$  (Fig. 3).  
222 These two-dimensional sensitivity analyses expand the previous findings. Whenever the delay is very  
223 small, there exists only one wave, as seen in Fig. 1B-E for the boundary case of  $\tau = 0$ . Irrespective of



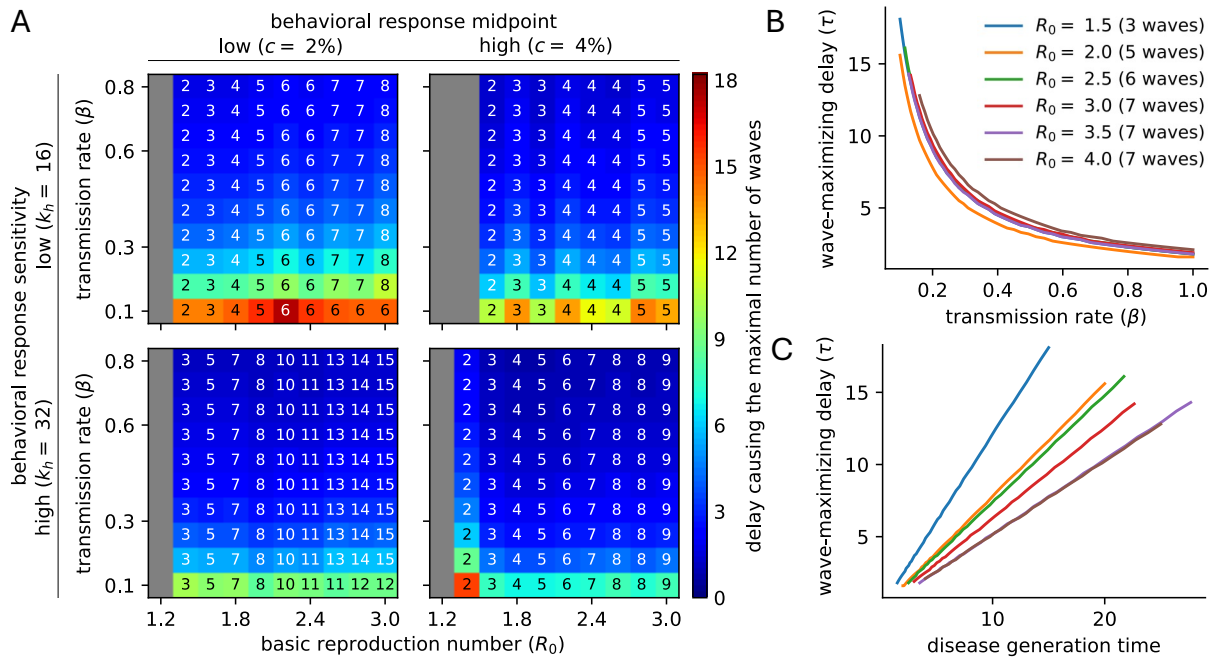

**Figure 4.** Four-dimensional sensitivity analysis. (A) The delay causing the maximal number of waves (color) and the corresponding number of waves (numbers in each cell) are shown for different basic reproduction numbers  $\mathcal{R}_0$  (x-axis), different disease generation times modulated by the transmission rate  $\beta$  (y-axis), as well as for four different shapes of the population-wide behavioral response function, parametrized by the behavioral response midpoint  $c$  and the sensitivity  $k_h$ . Gray cells indicate that the model behaves as the standard SIR model and exhibits only a single epidemic wave, irrespective of the delay parameter. (B,C) For a fixed  $\mathcal{R}_0$  value and fixed behavioral response function ( $c = 2\%$ ,  $k_h = 16$ ), the wave-maximizing delay (y-axis) is inversely proportional to (B) the transmission rate  $\beta$  and thus directly proportional to (C) the disease generation time. For each  $\mathcal{R}_0$  value, the line only extends across those x-values that yield the respective maximal number of waves, which is indicated in the legend in (B).

224 the specific delay, lower  $c$ -values generally induce more waves, which can be explained by the earlier  
225 onset of behavioral response and subsequent smaller reduction in susceptibles per wave (Fig. 3A). For  
226 a fixed behavioral response function (i.e., fixed  $c$ ), most waves occur at a delay of 5-7 days, with the  
227 wave-maximizing delay decreasing slowly as  $c$  increases. A more sensitive behavioral response function  
228 generally yields more waves (Fig. 3B). The wave-maximizing delay depends strongly on the behavioral  
229 response sensitivity. At high  $k_h$ -values (e.g.,  $k_h = 36$ ), a delay of 2.25 days suffices to induce nine waves,  
230 while this delay causes only a single wave when  $k_h < 14.3$ . At lower  $k_h$ -values, a longer delay is required  
231 for multiple waves to emerge.

## 232 Occurrence of epidemic waves depends on the interplay between delay in 233 behavior adjustment and disease generation time

234 In all results thus far, the basic reproduction number  $\mathcal{R}_0 = \beta/\gamma$  was 2, assuming a transmission rate  
235 of  $\beta = 0.4$  and recovery rate  $\gamma = 0.2$ . At higher transmission rates (and thus higher reproduction  
236 numbers), the number of waves increases and the wave-maximizing delay decreases (Fig. 3C). Similarly,  
237 when assuming slower recovery rates (and thus higher reproduction numbers), the number of epidemic  
238 waves increases as well (Fig. 3D). While increasing transmission rates and decreasing recovery rates both  
239 modulate the basic reproduction number in the same way, there exists a major difference between the  
240 two approaches, which is captured by the disease generation time—the average time between the infection  
241 of a person and the onward transmission by this person [60]. This key epidemiological metric (which is  
242 often approximated by the serial interval) is crucial for understanding how quickly a disease can spread  
243 within a population. Fast-spreading diseases such as COVID-19 have a short disease generation time and  
244 are characterized by comparably high transmission and recovery rates, while slow-spreading pathogens  
245 such as HIV-1 possess the opposite: long disease generation times and comparably low transmission and  
246 recovery rates (an infected person may even never naturally recover from some slow-spreading diseases).  
247 For instance, setting  $\beta = 0.8, \gamma = 0.2$  or  $\beta = 0.4, \gamma = 0.1$  both yields  $\mathcal{R}_0 = 4$ . The disease generation time  
248 in the latter case is, however, twice as long. For a fixed behavioral response function, both parameter  
249 choices can give rise to a maximum of nine waves (Fig. 3C,D). If  $\beta = 0.8, \gamma = 0.2$ , this maximal number  
250 of waves occurs at a delay  $\tau = 3$ . On the other hand, if  $\beta = 0.4, \gamma = 0.1$ , the wave-maximizing delay is  
251 exactly twice as high with  $\tau = 6$ .

252 To further investigate the relationship between the disease generation time and the wave-maximizing  
253 delay, we performed a four-dimensional sensitivity analysis. We modulated a given  $\mathcal{R}_0$ -value by a  
254 combination of transmission and recovery rates and counted the maximal number of waves and the  
255 wave-maximizing delay for four different behavioral response functions, characterized by two values for  
256 the midpoint  $c$  and two values for the sensitivity parameter  $k_h$  (Fig. 4A). Higher  $\mathcal{R}_0$ -values generally  
257 caused more waves, which can likely be explained by the stronger initial outbreak and a subsequent  
258 stronger behavioral response, followed by waves of restriction and relaxation that decrease in amplitude.  
259 For any  $\mathcal{R}_0$ , the maximal number of waves did not differ much when varying the disease generation  
260 time by an order of magnitude. The two parameters governing the shape of the behavioral response  
261 function exhibited the trends already observed in Fig. 2 and Fig. 3A,B: a highly sensitive behavioral  
262 response function that initiates behavior modification at low prevalence levels generally yields more waves.  
263 Irrespective of the shape of the behavioral response function, slower-spreading diseases exhibited the  
264 maximal number of waves at longer delays, providing further evidence for a strong association between  
265 the disease generation time and the wave-maximizing delay. For a fixed  $\mathcal{R}_0$ , the wave-maximizing delay  
266 proved inversely proportional to the transmission rate (Fig. 4B) and thus also to the recovery rate. Since  
267 the disease generation time is the reciprocal of the recovery rate, the wave-maximizing delay is directly  
268 proportional to the disease generation time (Fig. 4C).

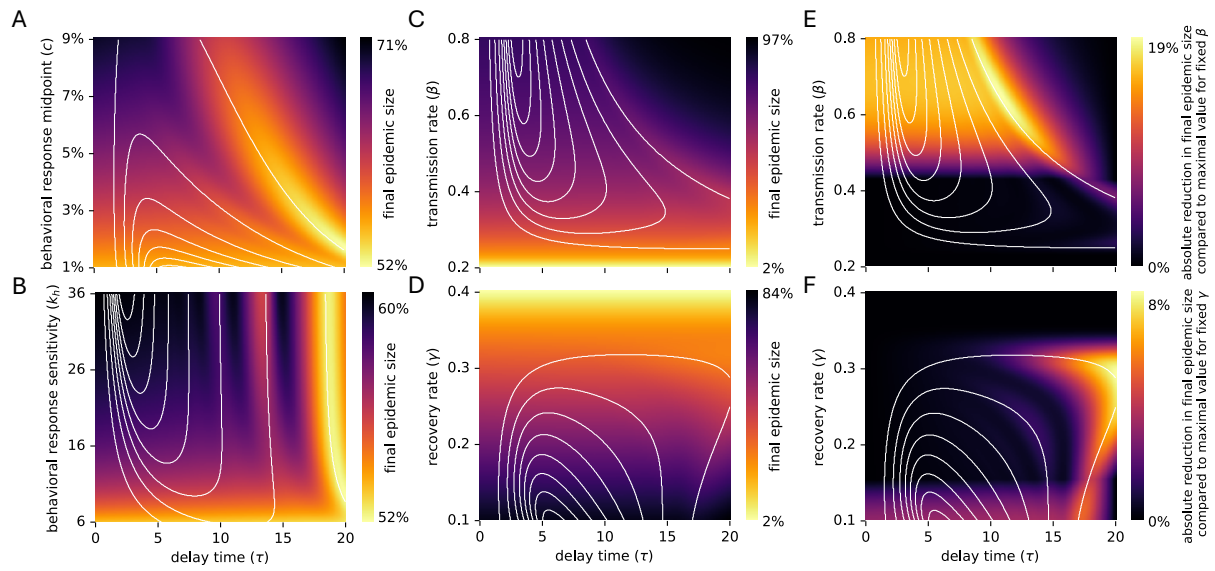

**Figure 5.** Disease and behavior-related parameters affect the final epidemic size non-monotonically. (A-D) The final epidemic size is shown for a range of values for the delay parameter ( $\tau$ , x-axis) and another model parameter (y-axis): (A) behavioral response point  $c$ , (B) behavioral response sensitivity  $k_h$ , (C) transmission rate  $\beta$ , (D) recovery rate  $\gamma$ . (E,F) The absolute reduction in final epidemic size is shown for a range of delays (x-axis) compared to the maximal value observed for a fixed (E) transmission rate or (F) recovery rate. (A-F) White lines depict the thresholds where the number of waves changes, as shown in Fig. 3. All non-specified parameters are at their default values listed in Table 1.

## 269 Population-wide behavioral adjustments non-trivially affect the final epidemic 270 size

271 In a standard SIR model (e.g., without reinfection and demographics), the final epidemic size describes  
272 the proportion of the total population that has been infected by the time the epidemic ends. For the  
273 standard SIR model (Eq. 1 with  $r \equiv 0$ ), there exists a one-to-one correspondence between the final  
274 epidemic size  $R_\infty$  and the basic reproduction number  $\mathcal{R}_0$ , implicitly described by

$$R_\infty = 1 - e^{-\mathcal{R}_0 R_\infty}. \quad (5)$$

275 If  $\beta = 0.4, \gamma = 0.2$ , as assumed by default here,  $\mathcal{R}_0 = 2$  yielding  $R_\infty = 79.7\%$ . Across a wide range  
276 of delay parameters and shapes of the behavioral response function (parametrized by  $c$  and  $k_h$ ), the  
277 final epidemic size varied between 52% and 71% (Fig. 5A,B). This highlights that a population-wide  
278 prevalence-dependent behavioral response generally reduces  $R_\infty$ , despite resulting in potentially multiple  
279 epidemic waves. Higher behavioral response midpoints  $c$  and sensitivity values  $k_h$  are generally associated  
280 with higher  $R_\infty$ -values. However, this trend is far from monotonic. Parameter choices close to the  
281 threshold where the number of epidemic waves changes give rise to lower final epidemic sizes. Higher  
282  $c$ -values or a longer delay in population-wide behavioral response both yield an initial epidemic wave  
283 that is more severe, associated with a higher peak prevalence level and more infections during the first  
284 wave (Fig. S3). The increased depletion of the pool of susceptibles can however lead to the avoidance of  
285 a second wave (if persistently  $\mathcal{R}_{\text{eff}} < 1$ ) and thus to a final epidemic size that is lower than in the case of  
286 two smaller waves of infections.

287 As expected, higher transmission rates and lower recovery rates, both associated with higher  $\mathcal{R}_0$ -values,  
288 generally cause a larger total number of infections over the course of the epidemic (Fig. 5C,D). However,  
289 the just-described phenomenon is also evident for variation in these parameters: Specifically at the  
290 transition from one to two waves, the final epidemic size can be substantially lower (Fig. 5E,F). In other  
291 words, when accounting for delayed population-wide behavioral adjustment, a higher basic reproduction

292 number, modulated by higher  $\beta$  or lower  $\gamma$  values, does not necessarily result in a higher total number  
293 of infections. Instead, the final epidemic size depends on the length of the delay in case-reporting and  
294 decision-making.

## 295 Discussion

296 Using a simple yet insightful behavioral-epidemiological model, we examined the impact of information  
297 delay on both the generation of oscillatory epidemic dynamics and consequently on the final epidemic  
298 size. We explored the trade-offs between different stringency levels of behavioral responses, information  
299 time lags, and pathogen characteristics (specifically, the disease generation time). Our results show  
300 that immediate risk-based behavioral adaptation effectively avoids high prevalence levels by distributing  
301 infections over time. Delays in information availability and decision-making can greatly impact the shape  
302 of infectious disease dynamics. Delayed behavioral responses can induce oscillatory dynamics and produce  
303 non-monotonic final epidemic sizes. The emergence of these phenomena is modulated by the interplay  
304 between information availability, response stringency, and disease generation time. Particularly, our  
305 results show that (i) adaptive human behavior shapes the amplitude and frequency of epidemic waves;  
306 (ii) the final epidemic size exhibits non-monotonic changes as a function of several behavior or disease  
307 parameters, where the minimal final epidemic size is attained on regimes that exhibit a few damped  
308 oscillations (i.e., when the number of epidemic waves changes).

309 Our findings indicate that the emergence of epidemic waves is heavily influenced by the feedback  
310 between the timing, severity and sensitivity of the behavioral response, as well as transmission and  
311 recovery rates. Notably, if the response is either too prompt or excessively delayed, multiple waves do  
312 not emerge. Significantly delayed responses may come too late, missing the peak of new infections and  
313 depleting the susceptible population, resulting in fewer or no subsequent waves. Conversely, hardly  
314 delayed responses yield a prolonged, low-prevalence first wave and lower the susceptible pool before any  
315 decline in cases, preventing the formation of additional waves. Interestingly, the range of information  
316 time lags that yields multi-wave dynamics depends on the disease generation time, which proved to be  
317 directly proportional to the wave-maximizing delay.

318 Moreover, our results confirm previous observations by Qiu *et. al.* and Morsky *et. al.* about the  
319 non-monotonic final epidemic size [18,19]. In contrast to these studies, we show that the incorporation of  
320 a continuous reaction space prevents discontinuities in the final epidemic size, avoiding the emergence of  
321 threshold points. It is known that the timing and intensity of behavioral responses are not uniform across  
322 populations. Variations in awareness, risk perception, age, socioeconomic status, cultural background, and  
323 adherence to protective measures contribute to a gradual and uneven shift in collective behavior [25,31,61].  
324 Our model partly captures this variability, avoiding rigid step-wise behavioral regimes and instead allowing  
325 for smooth transitions in effective contact reduction, capturing the average population-wide behavior.  
326 It is worth to notice that our results focus on the final epidemic size in the absence of centralized  
327 interventions. Future research could consider more complex models that explore the interplay between  
328 potential centralized and decentralized interventions available to contain epidemics.

329 In this study, we assumed that behavioral responses are exclusively driven by the disease prevalence  
330 and do not vary due to factors such as “epidemic fatigue” or economic constraints, which would limit the  
331 frequency and action space of behavioral choices [62–65]. The recent COVID-19 pandemic highlighted  
332 that human behavior adapts over time. Epidemic fatigue was observed throughout the world, which  
333 implies that the behavioral response midpoint will likely increase over the course of an outbreak. Similarly,  
334 the delays in information availability will likely fluctuate. Delays in case-reporting will decrease as  
335 testing capacities increase. On the contrary, media coverage frequency will generally decrease, leading  
336 to potentially longer delays in risk awareness and decision-making. Further, we considered only the  
337 population-wide behavioral response, which we assumed aggregates all individual decision-making. That  
338 is, we ignored heterogeneities in compliance, risk perception, and vulnerability among different subgroups,  
339 as well as seasonality or pathogen importation/mutations [24,30,66–72]. Moreover, we assumed individuals  
340 are naive to the impact their decisions impose on others: we did not incorporate costs and benefits that  
341 behavior would have on others, missing the impact of empathy or social group affinities in structured

342 populations.

343 The relative simplicity of our model enabled a comprehensive model analysis. To show that the main  
344 finding - adaptive human behavior and delays in information availability suffice for epidemic waves to  
345 emerge - is qualitatively insensitive to the specific choice of compartmental model, we analyzed the  
346 dynamics of an SEIR model, in which individuals upon infection first transition through a latency period  
347 before being infectious and counted in the disease prevalence. We found that oscillatory dynamics  
348 still emerged and the main findings were preserved (Fig. S4), although a longer latency period yielded  
349 fewer epidemic waves for a fixed delay in information availability (Fig. S5). A detailed analysis of more  
350 complicated behavioral-compartmental models constitutes an interesting avenue for future study.

351 The exhibited ability of epidemic waves to emerge solely due to “natural” human behavior and  
352 circumstances suggests that epidemic interventions should not only target the biological aspects of the  
353 disease but also consider the joint dynamics with the evolving behavioral responses of the population.  
354 The insights from our model could help explain recurrent patterns seen in real-world epidemics, such as  
355 early stages of the COVID-19 epidemic in the United States when behavioral responses mainly shaped  
356 transmission. Behavioral changes like social distancing and strategic contacts may independently sustain  
357 epidemic waves, highlighting the role of behavioral inertia in generating multiple peaks.

358 Our results demonstrate that epidemic waves can emerge autonomously from the feedback between  
359 disease dynamics and human behavior, without the need for exogenous shocks like mutations or seasonal  
360 effects. This has significant implications for public health policy and the development of integral  
361 understanding of behavioral epidemiology, as it suggests that multiple waves can occur even in the  
362 absence of any external factors. Understanding how different types of delays—whether due to social,  
363 logistical, or information factors—affect disease dynamics could refine our model and yield actionable  
364 insights for public health strategies. Our results underscore the need to integrate the interplay between  
365 behavioral and infectious disease dynamics into epidemic models, as timely and adaptive interventions  
366 could play a critical role in mitigating the impact of subsequent outbreaks. Future work to extend  
367 the developed framework would explore more complex behavioral responses, such as varying levels of  
368 compliance within subgroups of a population, or incorporating additional factors like vaccination or  
369 waning immunity. Moreover, contrasting the model to empirical epidemic data from past epidemics could  
370 help validate its predictive power and provide insights into optimizing intervention strategies to minimize  
371 the impact of future outbreaks.

372 In conclusion, our study fills a critical gap in the understanding of autonomous wave generation  
373 in epidemic models by linking human behavior and delays in information availability to the spread of  
374 diseases in a natural and dynamic way. By integrating behavioral responses into epidemic modeling, this  
375 work contributes to a deeper understanding of behavioral-epidemiological systems and highlights the  
376 importance of timely and sustained interventions in mitigating the effects of infectious disease outbreaks.

377 **Acknowledgments.** All code underlying this study is freely available at [https://github.com/ckadelka/epidemic-](https://github.com/ckadelka/epidemic-waves)  
378 waves. BE was partially supported by the NSF through DMS Award Number:2327710 and Expeditions  
379 in Computing Grant CCF-1918656. CK was partially supported by a travel grant from the Simons  
380 Foundation (grant number 712537).

## 381 References

- 382 1. Jeffery K Taubenberger and David M Morens. 1918 influenza: the mother of all pandemics. *Revista*  
383 *Biomedica*, 17(1):69–79, 2006.
- 384 2. Mark A Miller, Cecile Viboud, Marta Balinska, and Lone Simonsen. The signature features of  
385 influenza pandemics—implications for policy. *New England Journal of Medicine*, 360(25):2595–2598,  
386 2009.
- 387 3. Kathy Leung, Joseph T Wu, Di Liu, and Gabriel M Leung. First-wave covid-19 transmissibility  
388 and severity in china outside hubei after control measures, and second-wave scenario planning: a  
389 modelling impact assessment. *The Lancet*, 395(10233):1382–1393, 2020.

- 390 4. William Ogilvy Kermack and Anderson G McKendrick. A contribution to the mathematical  
391 theory of epidemics. *Proceedings of the Royal Society of London. Series A, Containing papers of a*  
392 *mathematical and physical character*, 115(772):700–721, 1927.
- 393 5. Herbert W Hethcote. The mathematics of infectious diseases. *SIAM review*, 42(4):599–653, 2000.
- 394 6. Anna Mummert, Howard Weiss, Li-Ping Long, José M Amigó, and Xiu-Feng Wan. A perspective  
395 on multiple waves of influenza pandemics. *PloS one*, 8(4):e60343, 2013.
- 396 7. Megan Scudellari. How the pandemic might play out in 2021 and beyond. *Nature*, 584(7819):22–25,  
397 2020.
- 398 8. Giacomo Cacciapaglia, Corentin Cot, and Francesco Sannino. Multiwave pandemic dynamics  
399 explained: How to tame the next wave of infectious diseases. *Scientific reports*, 11(1):6638, 2021.
- 400 9. Tyll Krueger, Krzysztof Gogolewski, Marcin Bodych, Anna Gambin, Giulia Giordano, Sarah  
401 Cuschieri, Thomas Czypionka, Matjaz Perc, Elena Petelos, Magdalena Rosińska, et al. Risk  
402 assessment of covid-19 epidemic resurgence in relation to sars-cov-2 variants and vaccination passes.  
403 *Communications Medicine*, 2(1):23, 2022.
- 404 10. Bo Xu, Jun Cai, Daihai He, Gerardo Chowell, and Bing Xu. Mechanistic modelling of multiple  
405 waves in an influenza epidemic or pandemic. *Journal of theoretical biology*, 486:110070, 2020.
- 406 11. Anton Camacho, Sébastien Ballesteros, Andrea L Graham, Fabrice Carrat, Oliver Ratmann, and  
407 Bernard Cazelles. Explaining rapid reinfections in multiple-wave influenza outbreaks: Tristan  
408 da cunha 1971 epidemic as a case study. *Proceedings of the Royal Society B: Biological Sciences*,  
409 278(1725):3635–3643, 2011.
- 410 12. Juan Pablo Gutiérrez-Jara, Katia Vogt-Geisse, Maritza Cabrera, Fernando Córdova-Lepe, and  
411 María Teresa Muñoz-Quezada. Effects of human mobility and behavior on disease transmission in  
412 a covid-19 mathematical model. *Scientific Reports*, 12(1):10840, 2022.
- 413 13. Laura Di Renzo, Paola Gualtieri, Francesca Pivari, Laura Soldati, Alda Attinà, Giulia Cinelli,  
414 Claudia Leggeri, Giovanna Caparello, Luigi Barrea, Francesco Scerbo, et al. Eating habits and  
415 lifestyle changes during covid-19 lockdown: an italian survey. *Journal of translational medicine*,  
416 18:1–15, 2020.
- 417 14. Philipp Dönges, Joel Wagner, Sebastian Contreras, Emil N Iftekhar, Simon Bauer, Sebastian B  
418 Mohr, Jonas Dehning, André Calero Valdez, Mirjam Kretzschmar, Michael Mäs, et al. Interplay  
419 between risk perception, behavior, and covid-19 spread. *Frontiers in Physics*, 10:842180, 2022.
- 420 15. Weike Zhou, Aili Wang, Fan Xia, Yanni Xiao, and Sanyi Tang. Effects of media reporting on  
421 mitigating spread of covid-19 in the early phase of the outbreak. *Mathematical Biosciences and*  
422 *Engineering*, 17(3):2693–2707, 2020.
- 423 16. Sherry Towers, Shehzad Afzal, Gilbert Bernal, Nadya Bliss, Shala Brown, Baltazar Espinoza,  
424 Jasmine Jackson, Julia Judson-Garcia, Maryam Khan, Michael Lin, et al. Mass media and the  
425 contagion of fear: the case of ebola in america. *PloS one*, 10(6):e0129179, 2015.
- 426 17. Asma Azizi, Cesar Montalvo, Baltazar Espinoza, Yun Kang, and Carlos Castillo-Chavez. Epi-  
427 demics on networks: Reducing disease transmission using health emergency declarations and peer  
428 communication. *Infectious Disease Modelling*, 5:12–22, 2020.
- 429 18. Bryce Morsky, Felicia Magpantay, Troy Day, and Erol Akçay. The impact of threshold decision  
430 mechanisms of collective behavior on disease spread. *Proceedings of the National Academy of*  
431 *Sciences*, 120(19):e2221479120, 2023.

- 432 19. Zirou Qiu, Baltazar Espinoza, Vitor V Vasconcelos, Chen Chen, Sara M Constantino, Stefani A  
433 Crabtree, LuoJun Yang, Anil Vullikanti, Jianghuo Chen, Jörgen Weibull, et al. Understanding the  
434 coevolution of mask wearing and epidemics: A network perspective. *Proceedings of the National*  
435 *Academy of Sciences*, 119(26):e2123355119, 2022.
- 436 20. Shari Messinger Cayetano and Lee Crandall. Paradox of success and public perspective: Covid-19  
437 and the perennial problem of prevention. *J Epidemiol Community Health*, 74(8):679–679, 2020.
- 438 21. Anna Petherick, Rafael Goldszmidt, Eduardo B Andrade, Rodrigo Furst, Thomas Hale, Annalena  
439 Pott, and Andrew Wood. A worldwide assessment of changes in adherence to covid-19 protective  
440 behaviours and hypothesized pandemic fatigue. *Nature Human Behaviour*, 5(9):1145–1160, 2021.
- 441 22. Alina Glaubitz and Feng Fu. Oscillatory dynamics in the dilemma of social distancing. *Proceedings*  
442 *of the Royal Society A*, 476(2243):20200686, 2020.
- 443 23. Sansao A Pedro, Frank T Ndjomatchoua, Peter Jentsch, Jean M Tchuente, Madhur Anand, and  
444 Chris T Bauch. Conditions for a second wave of covid-19 due to interactions between disease  
445 dynamics and social processes. *Frontiers in Physics*, 8:574514, 2020.
- 446 24. Baltazar Espinoza, Chadi M Saad-Roy, Bryan T Grenfell, Simon A Levin, and Madhav Marathe.  
447 Adaptive human behaviour modulates the impact of immune life history and vaccination on  
448 long-term epidemic dynamics. *Proceedings B*, 291(2033):20241772, 2024.
- 449 25. Ronan F Arthur, May Levin, Alexandre Labrogere, and Marcus W Feldman. Age-differentiated  
450 incentives for adaptive behavior during epidemics produce oscillatory and chaotic dynamics. *PLoS*  
451 *computational biology*, 19(9):e1011217, 2023.
- 452 26. Xingru Chen and Feng Fu. Imperfect vaccine and hysteresis. *Proceedings of the royal society B*,  
453 286(1894):20182406, 2019.
- 454 27. Stephen M Kissler, Christine Tedijanto, Edward Goldstein, Yonatan H Grad, and Marc Lipsitch.  
455 Projecting the transmission dynamics of SARS-CoV-2 through the postpandemic period. *Science*,  
456 368(6493):860–868, 2020.
- 457 28. Eli P Fenichel, Carlos Castillo-Chavez, M Graziano Ceddia, Gerardo Chowell, Paula A Gonzalez  
458 Parra, Graham J Hickling, Garth Holloway, Richard Horan, Benjamin Morin, Charles Perrings,  
459 et al. Adaptive human behavior in epidemiological models. *Proceedings of the National Academy*  
460 *of Sciences*, 108(15):6306–6311, 2011.
- 461 29. Charles Perrings, Carlos Castillo-Chavez, Gerardo Chowell, Peter Daszak, Eli P Fenichel, David  
462 Finnoff, Richard D Horan, A Marm Kilpatrick, Ann P Kinzig, Nicolai V Kuminoff, et al. Merging  
463 economics and epidemiology to improve the prediction and management of infectious disease.  
464 *EcoHealth*, 11:464–475, 2014.
- 465 30. Baltazar Espinoza, Madhav Marathe, Samarth Swarup, and Mugdha Thakur. Asymptomatic  
466 individuals can increase the final epidemic size under adaptive human behavior. *Scientific reports*,  
467 11(1):19744, 2021.
- 468 31. Baltazar Espinoza, Samarth Swarup, Christopher L Barrett, and Madhav Marathe. Heterogeneous  
469 adaptive behavioral responses may increase epidemic burden. *Scientific Reports*, 12(1):11276, 2022.
- 470 32. Chris T Bauch, Alison P Galvani, and David JD Earn. Group interest versus self-interest in  
471 smallpox vaccination policy. *Proceedings of the National Academy of Sciences*, 100(18):10564–10567,  
472 2003.
- 473 33. Chris T Bauch and David JD Earn. Vaccination and the theory of games. *Proceedings of the*  
474 *National Academy of Sciences*, 101(36):13391–13394, 2004.

- 475 34. Timothy C Reluga. Game theory of social distancing in response to an epidemic. *PLoS computational*  
476 *biology*, 6(5):e1000793, 2010.
- 477 35. KM Ariful Kabir and Jun Tanimoto. Evolutionary game theory modelling to represent the  
478 behavioural dynamics of economic shutdowns and shield immunity in the COVID-19 pandemic.  
479 *Royal Society open science*, 7(9):201095, 2020.
- 480 36. Arne Traulsen, Simon A Levin, and Chadi M Saad-Roy. Individual costs and societal benefits of  
481 interventions during the covid-19 pandemic. *Proceedings of the National Academy of Sciences*,  
482 120(24):e2303546120, 2023.
- 483 37. Sebastian Funk, Shweta Bansal, Chris T Bauch, Ken TD Eames, W John Edmunds, Alison P  
484 Galvani, and Petra Klepac. Nine challenges in incorporating the dynamics of behaviour in infectious  
485 diseases models. *Epidemics*, 10:21–25, 2015.
- 486 38. Bruno Buonomo and Rossella Della Marca. Effects of information-induced behavioural changes  
487 during the COVID-19 lockdowns: the case of Italy. *Royal Society open science*, 7(10):201635, 2020.
- 488 39. Alberto d’Onofrio and Piero Manfredi. Information-related changes in contact patterns may  
489 trigger oscillations in the endemic prevalence of infectious diseases. *Journal of Theoretical Biology*,  
490 256(3):473–478, 2009.
- 491 40. Neil Ferguson. Capturing human behaviour. *Nature*, 446(7137):733–733, 2007.
- 492 41. Iain R Moyles, Jane M Heffernan, and Jude D Kong. Cost and social distancing dynamics in a  
493 mathematical model of covid-19 with application to ontario, canada. *Royal Society open science*,  
494 8(2):201770, 2021.
- 495 42. Chris T Bauch and Alison P Galvani. Social factors in epidemiology. *Science*, 342(6154):47–49,  
496 2013.
- 497 43. Sebastian Funk, E Gilad, and Vincent AA Jansen. Endemic disease, awareness, and local behavioural  
498 response. *Journal of theoretical biology*, 264(2):501–509, 2010.
- 499 44. Jay J Van Bavel, Katherine Baicker, Paulo S Boggio, Valerio Capraro, Aleksandra Cichocka, Mina  
500 Cikara, Molly J Crockett, Alia J Crum, Karen M Douglas, James N Druckman, et al. Using  
501 social and behavioural science to support covid-19 pandemic response. *Nature human behaviour*,  
502 4(5):460–471, 2020.
- 503 45. Baltazar Espinoza, Aniruddha Adiga, Srinivasan Venkatramanan, Andrew Scott Warren, Jiangzhuo  
504 Chen, Bryan Leroy Lewis, Anil Vullikanti, Samarth Swarup, Sifat Moon, Christopher Louis Barrett,  
505 et al. Coupled models of genomic surveillance and evolving pandemics with applications for timely  
506 public health interventions. *Proceedings of the National Academy of Sciences*, 120(48):e2305227120,  
507 2023.
- 508 46. Xinmiao Rong, Liu Yang, Huidi Chu, and Meng Fan. Effect of delay in diagnosis on transmission  
509 of covid-19. *Math Biosci Eng*, 17(3):2725–40, 2020.
- 510 47. Tim E Carpenter, Joshua M O’Brien, Amy D Hagerman, and Bruce A McCarl. Epidemic and  
511 economic impacts of delayed detection of foot-and-mouth disease: a case study of a simulated  
512 outbreak in California. *Journal of Veterinary Diagnostic Investigation*, 23(1):26–33, 2011.
- 513 48. Alejandro Unda-López, Gabriel Osejo-Taco, Andrea Vinueza-Cabezas, Clara Paz, and Paula  
514 Hidalgo-Andrade. Procrastination during the covid-19 pandemic: A scoping review. *Behavioral*  
515 *Sciences*, 12(2):38, 2022.
- 516 49. Andrei Sontag, Tim Rogers, and Christian A Yates. Misinformation can prevent the suppression  
517 of epidemics. *Journal of the Royal Society Interface*, 19(188):20210668, 2022.



- 518 50. Sebastian Funk, Marcel Salathé, and Vincent AA Jansen. Modelling the influence of human  
519 behaviour on the spread of infectious diseases: a review. *Journal of the Royal Society Interface*,  
520 7(50):1247–1256, 2010.
- 521 51. Sebastian Funk, Erez Gilad, Chris Watkins, and Vincent AA Jansen. The spread of awareness and  
522 its impact on epidemic outbreaks. *Proceedings of the National Academy of Sciences*, 106(16):6872–  
523 6877, 2009.
- 524 52. Ceyhun Eksin, Keith Paarporn, and Joshua S Weitz. Systematic biases in disease forecasting—the  
525 role of behavior change. *Epidemics*, 27:96–105, 2019.
- 526 53. Hiroshi Nishiura and Gerardo Chowell. The effective reproduction number as a prelude to statistical  
527 estimation of time-dependent epidemic trends. *Mathematical and statistical estimation approaches*  
528 *in epidemiology*, pages 103–121, 2009.
- 529 54. Katelyn M Gostic, Lauren McGough, Edward B Baskerville, Sam Abbott, Keya Joshi, Christine  
530 Tedijanto, Rebecca Kahn, Rene Niehus, James A Hay, Pablo M De Salazar, et al. Practical  
531 considerations for measuring the effective reproductive number,  $r_t$ . *PLoS computational biology*,  
532 16(12):e1008409, 2020.
- 533 55. Carl Runge. Über die numerische auflösung von differentialgleichungen. *Mathematische Annalen*,  
534 46(2):167–178, 1895.
- 535 56. Wilhelm Kutta. *Beitrag zur näherungsweise Integration totaler Differentialgleichungen*. Teubner,  
536 1901.
- 537 57. Siu Kwan Lam, Antoine Pitrou, and Stanley Seibert. Numba: A llvm-based python jit compiler.  
538 In *Proceedings of the Second Workshop on the LLVM Compiler Infrastructure in HPC*, pages 1–6,  
539 2015.
- 540 58. Cristina Moya, Michelle A Kline, Paul E Smaldino, et al. Dynamics of behavior change in the  
541 covid world. *American Journal of Human Biology*, 32(5), 2020.
- 542 59. Iruka N Okeke, Robert S Manning, and Thomas Pfeiffer. Diagnostic schemes for reducing epidemic  
543 size of African viral hemorrhagic fever outbreaks. *The Journal of Infection in Developing Countries*,  
544 8(09):1148–1159, 2014.
- 545 60. Sonja Lehtinen, Peter Ashcroft, and Sebastian Bonhoeffer. On the relationship between se-  
546 rial interval, infectiousness profile and generation time. *Journal of the Royal Society Interface*,  
547 18(174):20200756, 2021.
- 548 61. Luojun Yang, Sara M Constantino, Bryan T Grenfell, Elke U Weber, Simon A Levin, and Vítor V  
549 Vasconcelos. Sociocultural determinants of global mask-wearing behavior. *Proceedings of the*  
550 *National Academy of Sciences*, 119(41):e2213525119, 2022.
- 551 62. Joakim A Weill, Matthieu Stigler, Olivier Deschenes, and Michael R Springborn. Social distancing  
552 responses to covid-19 emergency declarations strongly differentiated by income. *Proceedings of the*  
553 *National Academy of Sciences*, 117(33):19658–19660, 2020.
- 554 63. Mahmud Yesuf and Randall A Bluffstone. Poverty, risk aversion, and path dependence in low-income  
555 countries: Experimental evidence from ethiopia. *American Journal of Agricultural Economics*,  
556 91(4):1022–1037, 2009.
- 557 64. Bruno Kluwe-Schiavon, Thiago Wendt Viola, Lucas Poitevin Bandinelli, Sayra Catalina Coral  
558 Castro, Christian Haag Kristensen, Jaderson Costa da Costa, and Rodrigo Grassi-Oliveira. A  
559 behavioral economic risk aversion experiment in the context of the covid-19 pandemic. *Plos one*,  
560 16(1):e0245261, 2021.

- 561 65. Courtney A Moore, Benjamin C Ruisch, Javier A Granados Samayoa, Shelby T Boggs, Jesse T  
562 Ladanyi, and Russell H Fazio. Contracting covid-19: a longitudinal investigation of the impact of  
563 beliefs and knowledge. *Scientific Reports*, 11(1):20460, 2021.
- 564 66. Joshua S Weitz, Sang Woo Park, Ceyhun Eksin, and Jonathan Dushoff. Awareness-driven behavior  
565 changes can shift the shape of epidemics away from peaks and toward plateaus, shoulders, and  
566 oscillations. *Proceedings of the National Academy of Sciences*, 117(51):32764–32771, 2020.
- 567 67. Claus Kadelka and Audrey McCombs. Effect of homophily and correlation of beliefs on covid-19  
568 and general infectious disease outbreaks. *PloS one*, 16(12):e0260973, 2021.
- 569 68. Claus Kadelka, Md Rafiul Islam, Audrey McCombs, Jake Alston, and Noah Morton. Ethnic  
570 homophily affects vaccine prioritization strategies. *Journal of Theoretical Biology*, 555:111295,  
571 2022.
- 572 69. Manlio De Domenico and Eduardo G Altmann. Unraveling the origin of social bursts in collective  
573 attention. *Scientific reports*, 10(1):4629, 2020.
- 574 70. Riccardo Gallotti, Francesco Valle, Nicola Castaldo, Pierluigi Sacco, and Manlio De Domenico.  
575 Assessing the risks of ‘infodemics’ in response to covid-19 epidemics. *Nature human behaviour*,  
576 4(12):1285–1293, 2020.
- 577 71. Soroush Vosoughi, Deb Roy, and Sinan Aral. The spread of true and false news online. *Science*,  
578 359(6380):1146–1151, 2018.
- 579 72. Christopher Barrett, Keith Bisset, Jonathan Leidig, Achla Marathe, and Madhav V Marathe. An  
580 integrated modeling environment to study the co-evolution of networks, individual behavior and  
581 epidemics. *AI Magazine*, 31(1):75–87, 2010.

582

## Supplementary Materials for

583

### **Adaptive human behavior and delays in information availability autonomously modulate epidemic waves.**

584

585

Md Shahriar Mahmud, Solomon Eshun, Baltazar Espinoza, Claus Kadelka

586

Corresponding author: Claus Kadelka, [ckadelka@iastate.edu](mailto:ckadelka@iastate.edu)

587

**This PDF file includes:**

588

Figs. S1 to S5

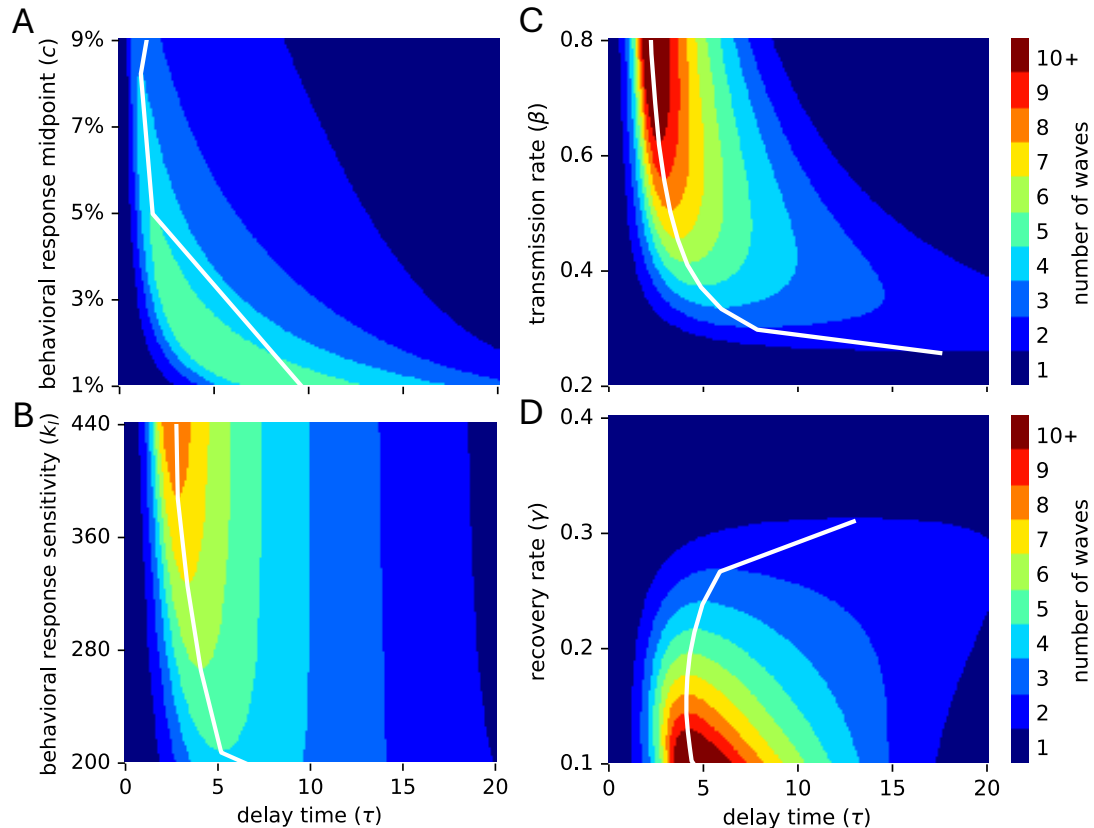

**Figure S1.** Two-dimensional sensitivity analysis, assuming a linear-scaled behavioral response function (Eq. 3). The number of epidemic waves is shown for a range of values for the delay parameter ( $\tau$ , x-axis) and another model parameter (y-axis): (A) behavioral response midpoint  $c$ , (B) sensitivity of the logistic contact reduction function  $k_l$ , (c) transmission rate  $\beta$ , (D) recovery rate  $\gamma$ . White lines connect the highest (in A,D) or lowest (in B,C) model parameter value and associated delay value that yields a specific number of multiple waves. All non-specified parameters are at their default values listed in Table 1.

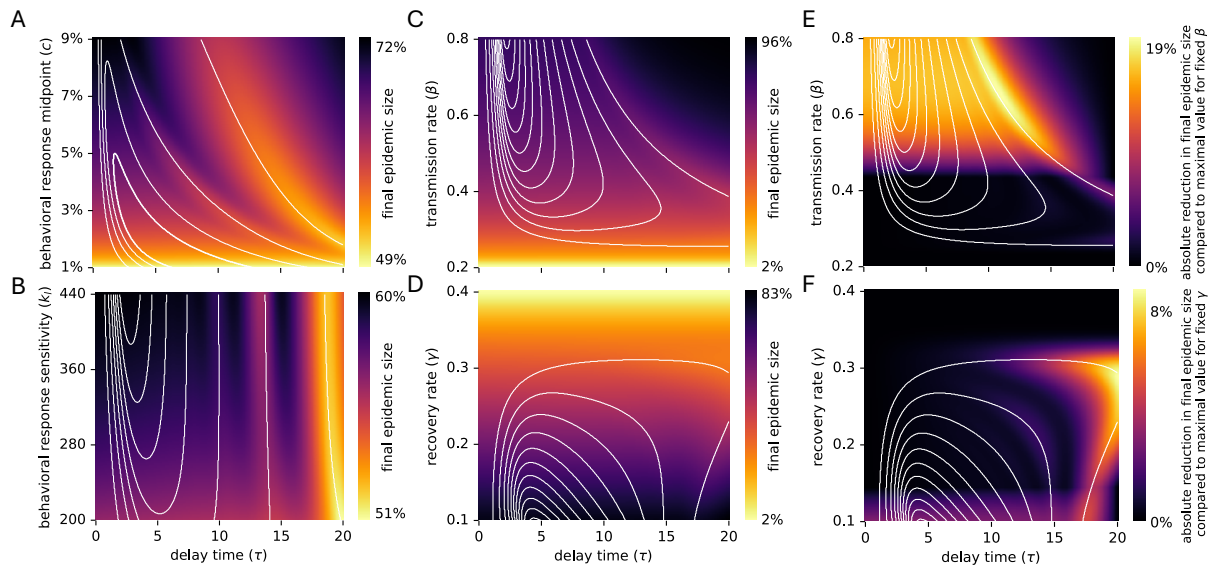

**Figure S2.** Disease and behavior-related parameters affect the final epidemic size non-monotonically, even when assuming a linear-scaled behavioral response function (Eq. 3). (A-D) The final epidemic size is shown for a range of values for the delay parameter ( $\tau$ , x-axis) and another model parameter (y-axis): (A) behavioral response point  $c$ , (B) logistic behavioral response sensitivity  $k_l$ , (C) transmission rate  $\beta$ , (D) recovery rate  $\gamma$ . (E,F) The absolute reduction in final epidemic size is shown for a range of delays (x-axis) compared to the maximal value observed for a fixed (E) transmission rate or (F) recovery rate. (A-F) White lines depict the thresholds where the number of waves changes, as shown in Fig. S1. All non-specified parameters are at their default values listed in Table 1.

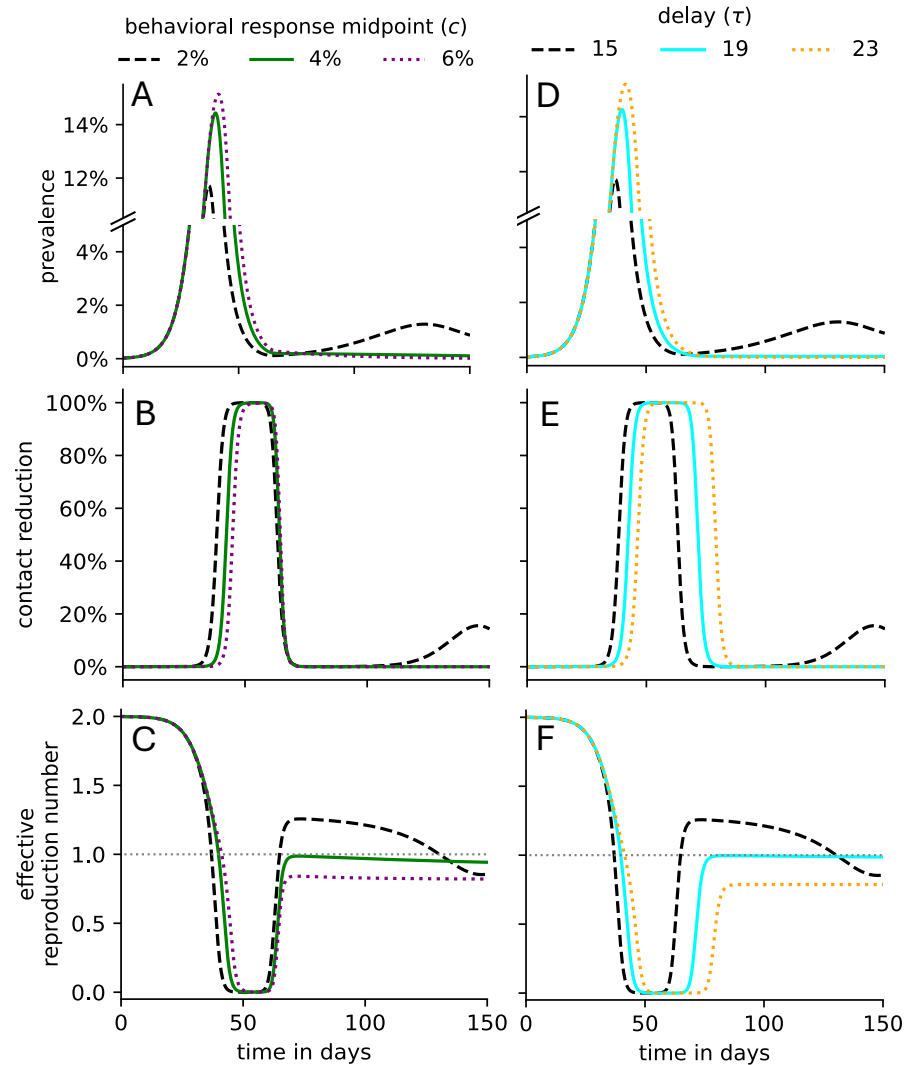

**Figure S3.** Cause of the non-monotonic final epidemic sizes. Disease dynamics and population-wide contact reduction for a variety of delays and Hill response functions. Given a delay of  $\tau$  days and a population-wide contact reduction function, parametrized by the behavioral response midpoint  $c$  and the sensitivity  $k_h$ , the (A,D) disease prevalence, (B,E) population-wide contact reduction, and (C,F) effective reproduction numbers are plotted over time for several (A-C)  $c$ -values (here  $\tau = 15$ ) and (D-F)  $\tau$ -values. All non-specified parameters are at their default values listed in Table 1. In all sub panels, the dashed black line depicts the dynamics for  $\tau = 15, c = 2\%, k_h = 16$ .

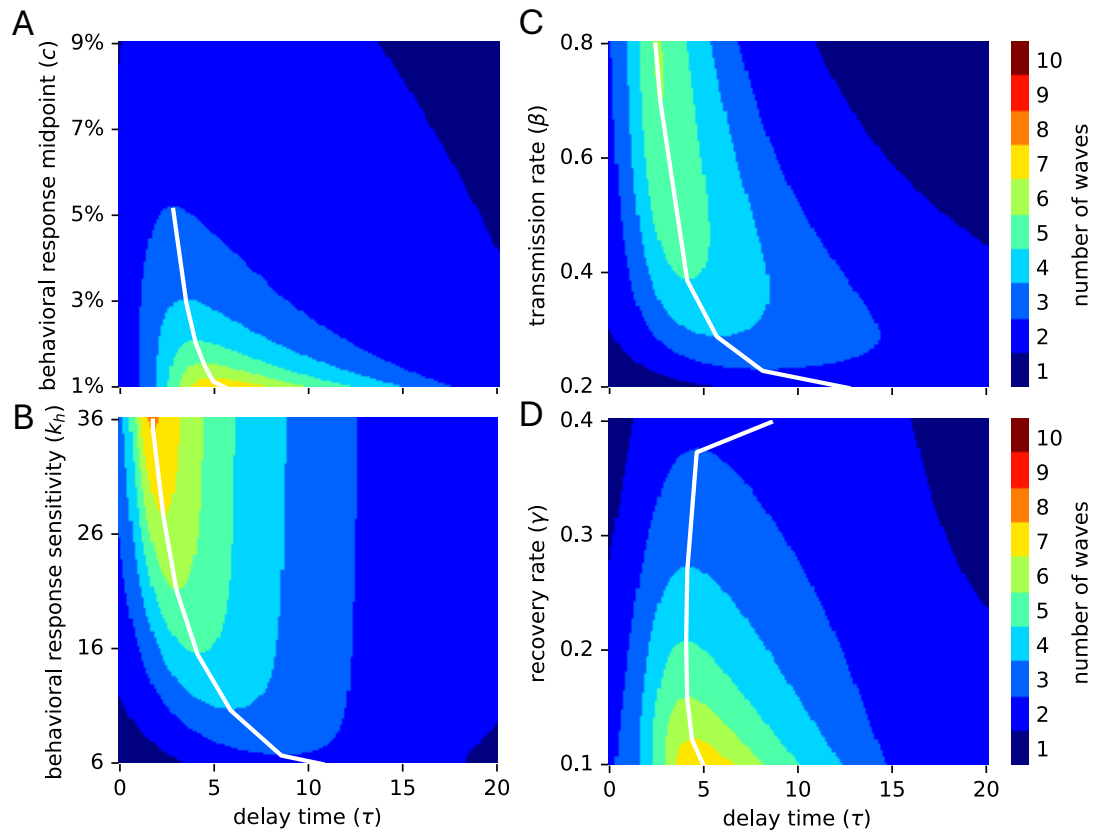

**Figure S4.** Two-dimensional sensitivity analysis, assuming SEIR-type dynamics with a latency period of 5 days. Exposed individuals are assumed to be non-infectious and not included in the prevalence, which determines the behavioral response. The number of epidemic waves is shown for a range of values for the delay parameter ( $\tau$ , x-axis) and another model parameter (y-axis): (A) behavioral response midpoint  $c$ , (B) behavioral response sensitivity  $k_h$ , (C) transmission rate  $\beta$ , (D) recovery rate  $\gamma$ . White lines connect the highest (in A,D) or lowest (in B,C) model parameter value and associated delay value that yields a specific number of multiple waves. All non-specified parameters are at their default values listed in Table 1.

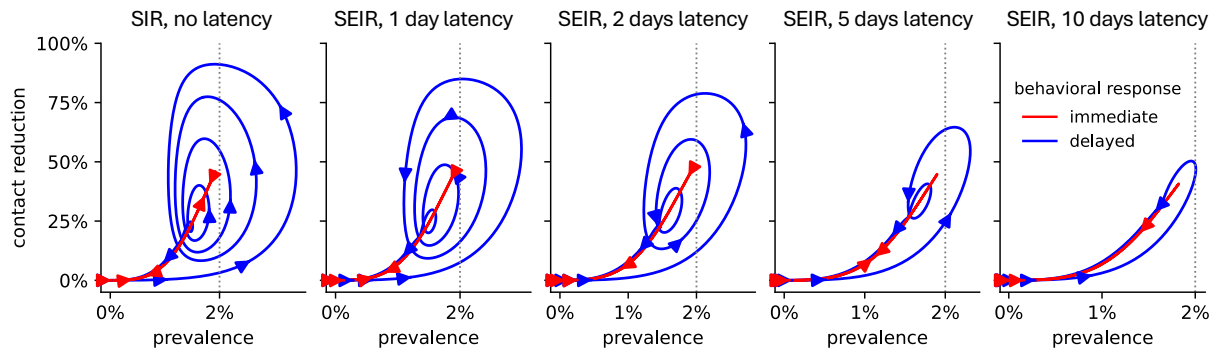

**Figure S5.** Effect of latency on the shape of disease dynamics. The trajectory of the prevalence and contact reduction under an immediate (red) and 5-day delayed (blue) behavioral response is shown. Exposed individuals are assumed to be non-infectious and not included in the prevalence, which determines the behavioral response. The arrows indicate the direction of the change over time. All non-specified parameters are at their default values listed in Table 1.
